# Supplementary material
Source: MDPI journal article supplement (https://www.mdpi.com/2673-8112/2/9/92)
Supplement: s1 [file s1]

Supplementary Material

**Table S1.** List of neuropsychological measures by site.

| Cognitive Domain         | Site                                                                                                                                                       |                                                                                                                                                                                                                                                                                                       |                                                                                                                                                                                                                                                                                                                                       |                                                                                                                                                                                         |
|--------------------------|------------------------------------------------------------------------------------------------------------------------------------------------------------|-------------------------------------------------------------------------------------------------------------------------------------------------------------------------------------------------------------------------------------------------------------------------------------------------------|---------------------------------------------------------------------------------------------------------------------------------------------------------------------------------------------------------------------------------------------------------------------------------------------------------------------------------------|-----------------------------------------------------------------------------------------------------------------------------------------------------------------------------------------|
|                          | UKA <sup>a</sup> (N=42)                                                                                                                                    | MGH PAC <sup>b</sup> (N=27)                                                                                                                                                                                                                                                                           | JH DMP <sup>c</sup> (N=8)                                                                                                                                                                                                                                                                                                             | MGH MARC <sup>d</sup> (N=7)                                                                                                                                                             |
| Language/Semantic Access | CERAD-NP, Boston Naming Test<br>RWT<br>CERAD-NP, Semantic Fluency                                                                                          | Boston Naming Test<br>NAB, Naming<br>Auditory Naming Test<br>COWAT, Animals<br>COWAT, Vegetables<br>D-KEFS Verbal Fluency, Total Category                                                                                                                                                             | Boston Naming Test-30<br>CIFA, Category Fluency                                                                                                                                                                                                                                                                                       | WAIS-IV, Information<br>EIWA-III, Information<br>NB, Naming<br>NB, Comprehension<br>NAM, Semantic Fluency<br>EOWPVT-4                                                                   |
| Attention/Working Memory | WAIS-IV, Digit Span<br>AVLT, Trial 1<br>CERAD-NP, Wordlist Trial 1                                                                                         | WAIS-IV, Digit Span<br>WMS-III, Digit Span<br>WAIS-IV, Arithmetic<br>CVLT-3, Trial 1<br>BVMT-R, Trial 1                                                                                                                                                                                               | WAIS-III, Digit Span<br>HVLt-R, Trial 1<br>BVMT-R, Trial 1                                                                                                                                                                                                                                                                            | WAIS-IV, Digit Span Forward<br>WAIS-IV, Digit Span Backward<br>EIWA-III, Longest Digit Span Forward<br>EIWA-III, Longest Digit Span Backward                                            |
| Processing Speed         | Trail Making Test, Part A<br>TAP, Alertness<br>TAP, Go-NoGo<br>TAP, Divided Attention                                                                      | Trail Making Test, Part A<br>Oral Trail Making Test, Part A<br>WAIS-IV, Coding<br>WAIS-IV, Symbol Search<br>Stroop, Word Reading<br>Stroop, Color Naming<br>D-KEFS Color Word<br>Interference, Word Reading<br>D-KEFS Color Word<br>Interference, Color Naming                                        | Trail Making Test, Part A<br>Oral Trail Making Test, Part A<br>TMB Trail Making Test, Part A<br>Stroop, Word Reading<br>Stroop, Color Naming<br>D-KEFS Color Word<br>Interference, Word Reading<br>D-KEFS Color Word<br>Interference, Color Naming<br>TMB, Digit-Symbol Matching                                                      | Color Trails 1<br>WAIS-IV, Coding<br>EIWA-III, Digit Symbol-Coding                                                                                                                      |
| Executive Functioning    | Trail Making Test, Part B<br>FWIT, Interference<br>RWT, Phonemic Fluency<br>CERAD-NP, Phonematic Fluency                                                   | Trail Making Test, Part B<br>Oral Trail Making Test, Part B<br>Stroop, Color-Word<br>D-KEFS Color Word<br>Interference, Inhibition<br>D-KEFS Color Word<br>Interference, Inhibition/Switching<br>D-KEFS Verbal Fluency, Total Letter<br>D-KEFS Verbal Fluency, Category Switching Total<br>COWAT, FAS | Trail Making Test, Part B<br>Oral Trail Making Test, Part B<br>TMB Trail Making Test, Part B<br>Stroop, Color-Word<br>D-KEFS Color Word<br>Interference, Inhibition<br>D-KEFS Color Word<br>Interference, Inhibition/Switching<br>WCST, Categories Correct<br>WCST, Perseverative Error<br>WCST, Total Errors<br>CIFA, Letter Fluency | NAM, Phonemic Fluency<br>Color Trails 2                                                                                                                                                 |
| Memory Encoding          | AVLT, Total Recall<br>CERAD-NP, Wordlist Total Recall                                                                                                      | HVLt-R, Total Recall<br>CVLT-3, Total Recall<br>WMS-IV Logical Memory, Immediate Recall<br>RBANS Story Memory, Immediate Recall<br>WMS-IV Visual Reproduction, Immediate Recall<br>BVMT-R, Total Recall                                                                                               | HVLt-R, Total Recall<br>BVMT-R, Total Recall<br>WMS-R, Logical Memory<br>NAB Shape Learning, Immediate Recognition                                                                                                                                                                                                                    | NB Word List, Total Recall<br>NAM Word List, Total Recall                                                                                                                               |
| Delayed Memory           | AVLT, Delayed Recall<br>AVLT, Recognition<br>CERAD-NP, Wordlist Delayed Recall<br>CERAD-NP Wordlist, Recognition Discriminability<br>ROCFT, Delayed Recall | HVLt-R, Delayed Recall<br>CVLT-3, Long Delay Free Recall<br>HVLt-R, Recognition Discrimination<br>CVLT-3, Recognition Discriminability<br>WMS-IV Logical Memory, Delayed Recall<br>RBANS Story Memory, Delay<br>BVMT-R, Delayed Recall                                                                | HVLt-R, Delayed Recall<br>HVLt-R, Percent Retained<br>HVLt-R, Recognition Discrimination<br>BVMT-R, Percent Retained<br>BVMT-R, Recognition Discrimination<br>BVMT-R, Delayed Recall<br>WMS-R, Logical Memory II                                                                                                                      | NB Word List, Delayed Recall<br>NAM Word List, Delayed Recall<br>NB Word List, Recognition<br>NAM Word List, Recognition<br>NB, Semicomplex Figure Recall<br>NAM, Complex Figure Recall |

|            |        |                                                          |                                          |                                                  |
|------------|--------|----------------------------------------------------------|------------------------------------------|--------------------------------------------------|
| Depression | HADS-D | Patient Health Questionnaire-9<br>BDI-II                 | Patient Health Questionnaire-9<br>BDI-II | Yesavage Geriatric Depression<br>Scale<br>BDI-II |
| Anxiety    | HADS-D | Generalized Anxiety Disorder-7<br>Beck Anxiety Inventory | Generalized Anxiety Disorder-7           |                                                  |

AVLT: The Auditory Verbal Learning Test, BDI-II: Beck Depression Inventory-II, BVMT: Brief Visuospatial Memory Test – Revised, CERAD-NP: CERAD Neuropsychologischen Testbatterie-Plus, CIFA: Calibrated Ideational Fluency Assessment, CLVT-3: California Verbal Learning Test – Third Edition, COWAT: Controlled Oral Word Association Test, D-KEFS: Delis-Kaplan Executive Function System, EIWA-III: Escala de Inteligencia Wechsler para Adultos - 3rd Edition, EOWPVT-4: Expressive One-Word Picture Vocabulary Test – Spanish-Bilingual Edition, FWIT: Farbwortinterferenztest nach Stroop, HADS-D: Hospital Anxiety Depression Skala, Deutsche Version, HVLT-R: Hopkins Verbal Learning Test – Revised, NAB: Neuropsychological Assessment Battery, NAM: Neuropsi Atencion y Memoria, NB: Neuropsi Breve, RBANS: Repeatable Battery for the Assessment of Neuropsychological Status, ROCFT: Rey–Osterrieth Complex Figure Test, RWT: Regensburger Wortflüssigkeits-Test, Stroop: Stroop Color and Word Test, TAP: Testbatterie für Aufmerksamkeitsprüfung, TMB: Test my Brain, WAIS-III: Wechsler Adult Intelligence Scale – Third Edition, WAIS-IV: Wechsler Adult Intelligence Scale – Fourth Edition, WCST: Modified Wisconsin Card Sorting Test, WMS-III: Wechsler Memory Scale – Third Edition, WMS-IV: Wechsler Memory Scale – Fourth Edition, WMS-R: Wechsler Memory Scale – Revised. <sup>a</sup> Department of Neurology of the RWTH Aachen University Hospital (UKA), Aachen, Germany. <sup>b</sup> Massachusetts General Hospital, Psychology Assessment Center, Boston, Massachusetts, USA. <sup>c</sup> Division of Medical Psychology at Johns Hopkins Hospital, Baltimore, Maryland, USA. <sup>d</sup> Massachusetts General Hospital Multicultural Assessment and Research Center, Boston, Massachusetts, USA
